# Supplementary material for: Reference-based RADseq resolves robust relationships among closely related species of lichen-forming fungi using metagenomic DNA
Source: PubMed Central journal article supplement (PMC5575168; doi:10.1038/s41598-017-09906-7), 2017-08-29

## SUPPLEMENTARY MATERIAL

### Reference-based RADseq resolves robust relationships among closely related species of lichen-forming fungi using metagenomic DNA

---

Felix Grewe<sup>1</sup>, Jen-Pen Huang<sup>1</sup>, Steven D. Leavitt<sup>1,2</sup>, and H. Thorsten Lumbsch<sup>1</sup>

<sup>1</sup> Integrative Research Center, Science and Education, Field Museum of Natural History, 1400 S Lake Shore Drive, Chicago, IL 60605, USA.

<sup>2</sup> Department of Biology & M. L. Bean Life Science Museum, Brigham Young University, Provo, UT, 84602 USA.

## **SUPPLEMENTARY MATERIAL ONLINE**

**Supplementary Table 1 – Origin of samples used in for this study.**

**Supplementary Figure 1 – Simulation of genome fragmentation using different**

**Restriction Enzymes.** Distribution of fragment sizes based on the digestion by restriction enzymes SbfI, PstI, NsiI, BclI, BstYI, and ApeKI is shown by grey bars. The proportion of fragments of sizes between 200 and 500 bp is highlighted in red.

**Supplementary Figure 2 – Phylogenetic tree inferred from the combined dataset that required at least 30 samples/loci for the final alignment.** Bootstrap values are represented by red numbers near nodes. The unit of the branch lengths is substitutions per site.

Supplementary Table 1

| DNA #                      | Clade (Leavitt <i>et al.</i> , 2011) | Voucher                  | Location                                                                 | ITS acc. nos. | Latitude  | Longitude | Elevation (m) | Collector(s)           |
|----------------------------|--------------------------------------|--------------------------|--------------------------------------------------------------------------|---------------|-----------|-----------|---------------|------------------------|
| shushanii_544              | <i>R. melanophthalma</i> C3          | BRY C55062               | USA, Utah, Wayne Co.: Thousand Lake Mountain (9)                         | HM577283      | 38.4366   | -111.4677 | 3270          | LDP                    |
| shushanii_543              | <i>R. melanophthalma</i> C4d         | BRY C55103               | USA, Utah, Wayne Co.: Thousand Lake Mountain (4)                         | HM577334      | 38.5079   | -111.5161 | 2550          | LDP                    |
| <b>melanophthalma_611</b>  | <i>R. melanophthalma</i> C2          | BRY C55044               | USA, Utah, Wayne Co.: northwest of Boulder Mountain (BM-1)               | HM577265      | 38.27364  | -111.6106 | 2344          | SDL, HCL, JHL, PAR     |
| melanophthalma_612         | <i>R. melanophthalma</i> C2          | BRY C55045               | USA, Utah, Wayne Co.: Thousand Lake Mountain (1)                         | HM577266      | 38.4243   | -111.6446 | 2220          | LDP                    |
| parilis_626                | <i>R. melanophthalma</i> C4b         | BRY C55080               | USA, Utah, Wayne Co.: Thousand Lake Mountain (3)                         | HM577311      | 38.5079   | -111.5505 | 2400          | LDP                    |
| parilis_632                | <i>R. melanophthalma</i> C4b         | BRY C55081               | USA, Utah, Wayne Co.: Thousand Lake Mountain (5)                         | HM577312      | 38.5076   | -111.4904 | 2725          | LDP                    |
| shushanii_653              | <i>R. melanophthalma</i> C3          | BRY C55070               | USA, Utah, Wayne Co.: Thousand Lake Mountain (9)                         | HM577291      | 38.4366   | -111.4677 | 3270          | LDP                    |
| porteri_658                | <i>R. melanophthalma</i> C4d         | BRY C55570               | USA, Utah, Wayne Co.: Thousand Lake Mountain (10)                        | HM577376      | 38.4432   | -111.4703 | 3400          | LDP                    |
| novomexicana_660           | <i>R. melanophthalma</i> C2          | BRY C55048               | USA, Utah, Wayne Co.: Thousand Lake Mountain (10)                        | HM577269      | 38.44317  | -111.4703 | 3400          | LDP                    |
| <b>parilis_664</b>         | <i>R. melanophthalma</i> C4b         | BRY C55088               | USA, New Mexico, San Juan Co.: vicinity of Aztec Ruins National Monument | HM577319      | 36.8348   | -108.0002 | 1721          | SDL, HCL               |
| polymorpha_669             | <i>R. melanophthalma</i> C4c         | BRY C55094               | USA, Idaho, Owyhee Co.: McBride Creeks Badlands                          | HM577325      | 43.3202   | -116.9795 | 1291          | SDL, HCL, JHL          |
| <b>novomexicana_679</b>    | <i>R. melanophthalma</i> C2          | BRY C55050               | USA, Utah, Emery Co.: San Rafael Swell                                   | HM577271      | 38.70424  | -110.7964 | 1967          | SDL                    |
| parilis_692                | parilis                              | EA 15-123A (BRY-C)       | USA, NV, Elko Co., Humboldt National Forest, Jarbridge WA, swit          | KU934750      | -         | -         | -             | -                      |
| occulta_695                | <i>R. melanophthalma</i> C4a         | BRY C55074               | USA, Utah, Juab Co.: West of Goshen                                      | HM577305      | 39.9697   | -112.0601 | 1840          | LLS (EA 18-140)        |
| parilis_698                | <i>R. melanophthalma</i> C4b         | BRY C55089               | USA, Montana, Deer Lodge Co.: southwest of Anaconda Copper               | HM577320      | 46.0565   | -112.982  | 1890          | LLS (EA 21-166)        |
| <b>occulta_706</b>         | <i>R. melanophthalma</i> C4a         | BRY C55075               | USA, Idaho, Butte Co.: Salmon Challis National Forest                    | HM577306      | 43.7197   | -113.0891 | 2432          | LLS (EA 37-356)        |
| <b>melanophthalma_708</b>  | <i>R. melanophthalma</i> C2          | BRY C55055               | USA, Idaho, Lemhi Co.: Salmon Challis National Forest                    | HM577276      | 44.56022  | -113.3507 | 1194          | LLS (EA 41-403)        |
| <b>porteri_711</b>         | porteri (aff.)                       | Leavitt 711 (BRY-C)      | USA, NV, White Pine Co.: Humboldt-Toiyabe N.F. Kalamazoo Mtn             | NA            | 38.54642  | -114.6385 | 2744          | LLS, SDL, JS           |
| porteri_712                | porteri (aff.)                       | Leavitt 712 (BRY-C)      | USA, NV, White Pine Co.: Humboldt-Toiyabe N.F. Kalamazoo Mtn             | KU934836      | 38.54642  | -114.6385 | 2744          | LLS, SDL, JS           |
| <b>porteri_713</b>         | <i>R. melanophthalma</i> C4d         | BRY C55149               | USA, Nevada, White Pine Co.: Humboldt-Toiyabe National Forest            | HM577380      | 38.5464   | -114.6385 | 2744          | SDL, LLS               |
| <b>melanophthalma_720</b>  | <i>R. melanophthalma</i> C2          | BRY C55056               | USA, Wyoming, Johnson Co.: west of Buffalo                               | HM577277      | 44.33849  | -106.7656 | 1581          | SDL                    |
| melanophthalma_721         | <i>R. melanophthalma</i> C2          | BRY C55057               | USA, Wyoming, Fremont Co.: Wind River Mountains                          | HM577278      | 42.73869  | -108.8352 | 2122          | SDL                    |
| haydenii_728               | <i>R. haydenii</i>                   | BRY C55032               | USA, WY, Sweetwater Co.: 16.1 E of Rason off Hwy 28 on Sqaw R            | HM577301      | -         | -         | -             | SDL                    |
| haydenii_729               | <i>R. haydenii</i>                   | BRY C55033               | USA, WY, Sweetwater Co.: 16.1 E of Rason off Hwy 28 on Sqaw R            | HM577302      | -         | -         | -             | SDL                    |
| novomexicana_730           | <i>R. novomexicana</i>               | BRY C55023               | USA, Utah, Summit Co.: Ashley National Forest                            | KU934707      | 40.5976   | -109.8406 | 2606          | SDL, LLS, GS           |
| novomexicana_731           | <i>R. novomexicana</i>               | BRY C55024               | USA, Utah, Summit Co.: Ashley National Forest                            | HM577255      | 40.5976   | -109.8406 | 2606          | SDL, LLS, GS           |
| <b>novomexicana_733</b>    | <i>R. novomexicana</i>               | BRY C55025               | USA, Utah, Summit Co.: Ashley National Forest                            | HM577256      | 40.5976   | -109.8406 | 2606          | SDL, LLS, GS           |
| melanophthalma_5165        | <i>R. melanophthalma</i> C2          | F Tshernyshev H2         | Kazakhstan, Bektan-Ata                                                   | JX948269      | 47.4172   | 74.7933   | 700           | S.E. Tshernyshev       |
| melanophthalma_5166        | <i>R. melanophthalma</i> C2          | MS014620                 | Iran, East Azarbaijan, Jolfa, Daran Village                              | JX948276      | 38.807389 | 45.83151  | 1850          | M. Sohrabi             |
| <b>melanophthalma_5169</b> | <i>R. melanophthalma</i> C2          | MS014623                 | Iran, East Azarbaijan, Jolfa, Daran Village                              | JX948273      | 38.807389 | 45.83151  | 1850          | M. Sohrabi             |
| parilis_6027               | <i>R. melanophthalma</i> C4b         | H9203310                 | Kyrgystan, Chatkal District - Chatkal Range                              | JX948192      | 41.53598  | 70.81087  | 2900          | Lommi, S               |
| parilis_6028               | <i>R. melanophthalma</i> C4b         | H9203313                 | Kyrgystan, Chatkal District - Chatkal Range                              | JX948193      | 41.53598  | 70.81087  | 2900          | Lommi, S               |
| melanophthalma_6724        | <i>R. melanophthalma</i> C2          | F Vondrak 9590           | Czech Republic, Lovosice, Ceske Mountains                                | JX948285      | 50.848    | 14.45     | -             | J. Vondrak             |
| <b>melanophthalma_6725</b> | <i>R. melanophthalma</i> C2          | F Vondrak 9590           | Czech Republic, Lovosice, Ceske Mountains                                | JX948286      | 50.848    | 14.45     | -             | J. Vondrak             |
| melanophthalma_6742        | melanophthalma                       | Fernandez-Mendoza s.n.   | Chile, Region de Atacama, Paso de San Francisco                          | JX948289      | -26.87    | -68.31    | 4864          | Fernandez-Mendoza s.n. |
| parilis_6743               | parilis                              | Fernandez-Mendoza s.n.   | Chile, Region de Atacama, Paso de San Francisco                          | JX948191      | -26.87    | -68.31    | 4864          | Fernandez-Mendoza s.n. |
| porteri_6758               | porteri (aff.) 'nevadensis'          | Leavitt 12-611 (F)       | USA, NV, Grant Range Wilderness Area-road to Timber Mountain             | KU934702      | -         | -         | -             | -                      |
| polymorpha_6769            | polymorpha                           | Leavitt 11-s.n. (F)      | USA, UT, vicinity of Vernon Reservoir                                    | KU934752      | -         | -         | -             | -                      |
| melanophthalma_6829        | melanophthalma                       | Vondrak 9740             | Turkey, Giresun, Giresun                                                 | KU934658      | -         | -         | -             | -                      |
| melanophthalma_6837        | melanophthalma                       | Vondrak 9985 (PRA)       | Russia, Altay                                                            | KU934659      | -         | -         | -             | -                      |
| <b>melanophthalma_6864</b> | melanophthalma                       | Vondrak 10035 (PRA)      | Russia, Altay                                                            | KU934661      | -         | -         | -             | -                      |
| <b>melanophthalma_6891</b> | melanophthalma                       | KuvKz 1334               | Russia, Orenburg                                                         | KU934662      | -         | -         | -             | -                      |
| melanophthalma_6892        | melanophthalma                       | KuvKz 1335               | Russia, Orenburg                                                         | KU934663      | -         | -         | -             | -                      |
| melanophthalma_6904        | melanophthalma                       | Kaz 12940                | Kazakhstan                                                               | KU934669      | -         | -         | -             | -                      |
| <b>melanophthalma_6905</b> | melanophthalma                       | Kaz 12922                | Kazakhstan                                                               | KU934670      | -         | -         | -             | -                      |
| haydenii_8680              | haydenii                             | Leavitt 8680 (F)         | USA, Idaho, Lemhi Valley                                                 | KU934631      | -         | -         | -             | -                      |
| <b>haydenii_8681</b>       | haydenii                             | Leavitt 8681 (F)         | USA, Idaho, Lemhi Valley                                                 | KU934632      | -         | -         | -             | -                      |
| haydenii_8682              | haydenii                             | Leavitt 8682 (F)         | USA, Idaho, Lemhi Valley                                                 | KU934633      | -         | -         | -             | -                      |
| polymorpha_8663o           | polymorpha                           | Leavitt-8663o (F)        | USA, Utah, Duchesne Co., Nutter's Ridge                                  | KU934754      | -         | -         | -             | -                      |
| porteri_8663r              | porteri                              | Leavitt-8663r (F)        | USA, Utah, Duchesne Co., Nutter's Ridge                                  | KU934795      | -         | -         | -             | -                      |
| polymorpha_8663t           | polymorpha                           | Leavitt-8663t (F)        | USA, Utah, Duchesne Co., Nutter's Ridge                                  | KU934756      | -         | -         | -             | -                      |
| shushanii_8664t            | shushanii                            | Leavitt 13-TLM-001 (BRY- | USA, Utah, Wayne Co., Thousand Lakes Mountain                            | KU934860      | -         | -         | -             | -                      |
| <b>shushanii_8664u</b>     | shushanii                            | Leavitt 13-TLM-001 (BRY- | USA, Utah, Wayne Co., Thousand Lakes Mountain                            | KU934861      | -         | -         | -             | -                      |
| polymorpha_8665l           | polymorpha                           | Leavitt-8665l (F)        | USA, Nevada, Nye Co., Barely Creek                                       | KU934757      | -         | -         | -             | -                      |
| polymorpha_8665o           | polymorpha                           | Leavitt-8665o (F)        | USA, Nevada, Nye Co., Barely Creek                                       | KU934758      | -         | -         | -             | -                      |
| porteri_8668c              | porteri                              | Leavitt-8668c (F)        | USA, Nevada, Nye Co., Mosquito Creek                                     | KU934812      | -         | -         | -             | -                      |
| polymorpha_8935g           | polymorpha                           | Leavitt 8935g (F)        | USA, Idaho, Lemhi Valley                                                 | KU934773      | -         | -         | -             | -                      |

Supplementary Figure 1

SbfI (CCTGA|GG)

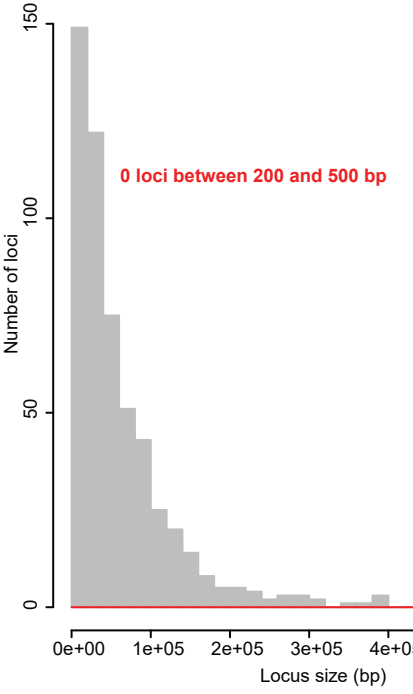

PstI (CTGCA|G)

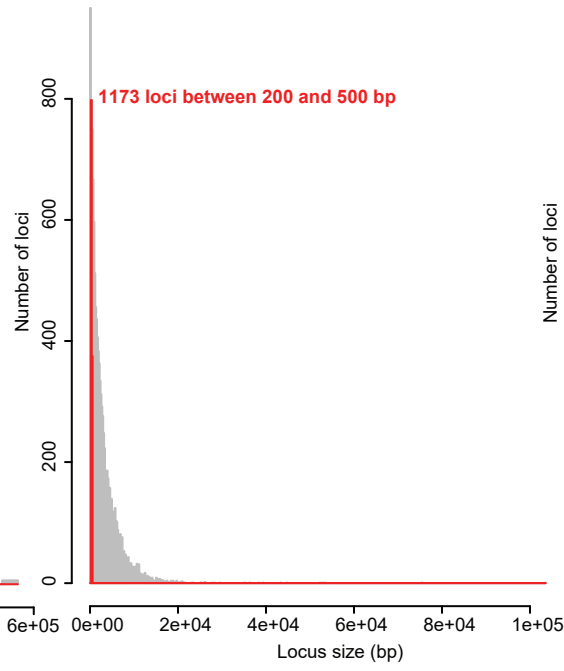

NsiI (ATGCA|T)

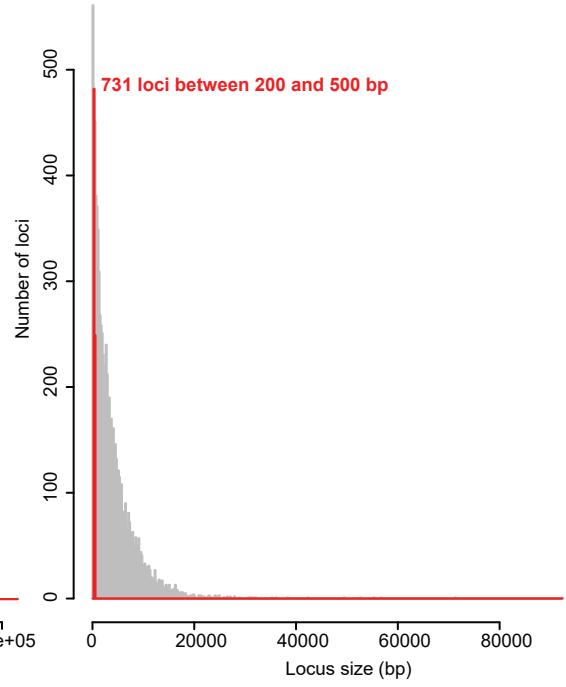

BclI (T|GATCA)

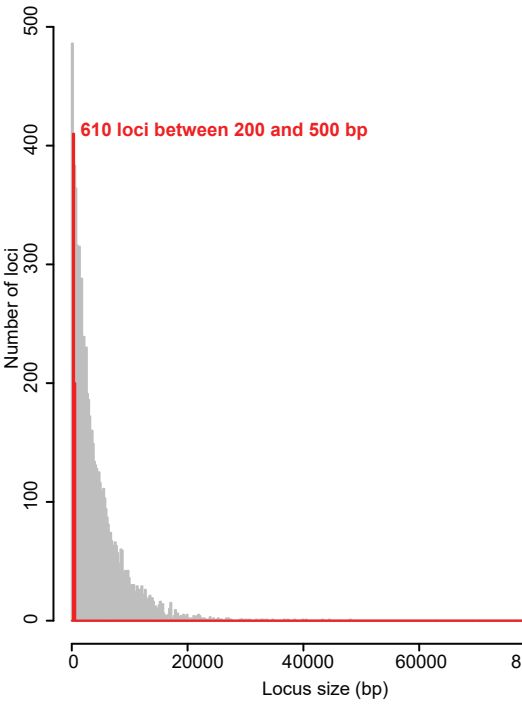

BstYI (R|GATCY)

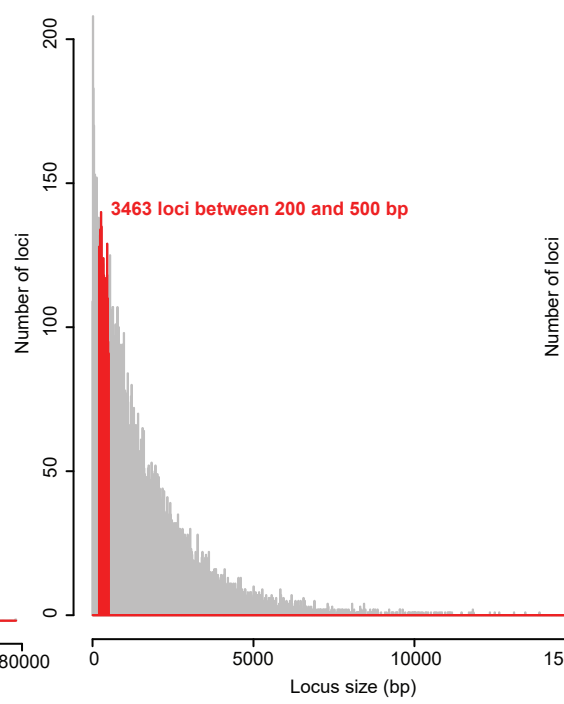

ApeKI (G|CWGC)

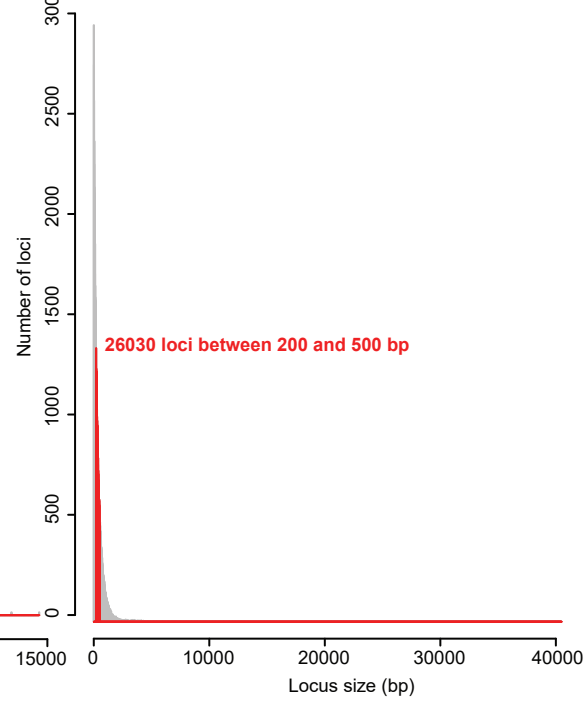

Supplementary Figure 2

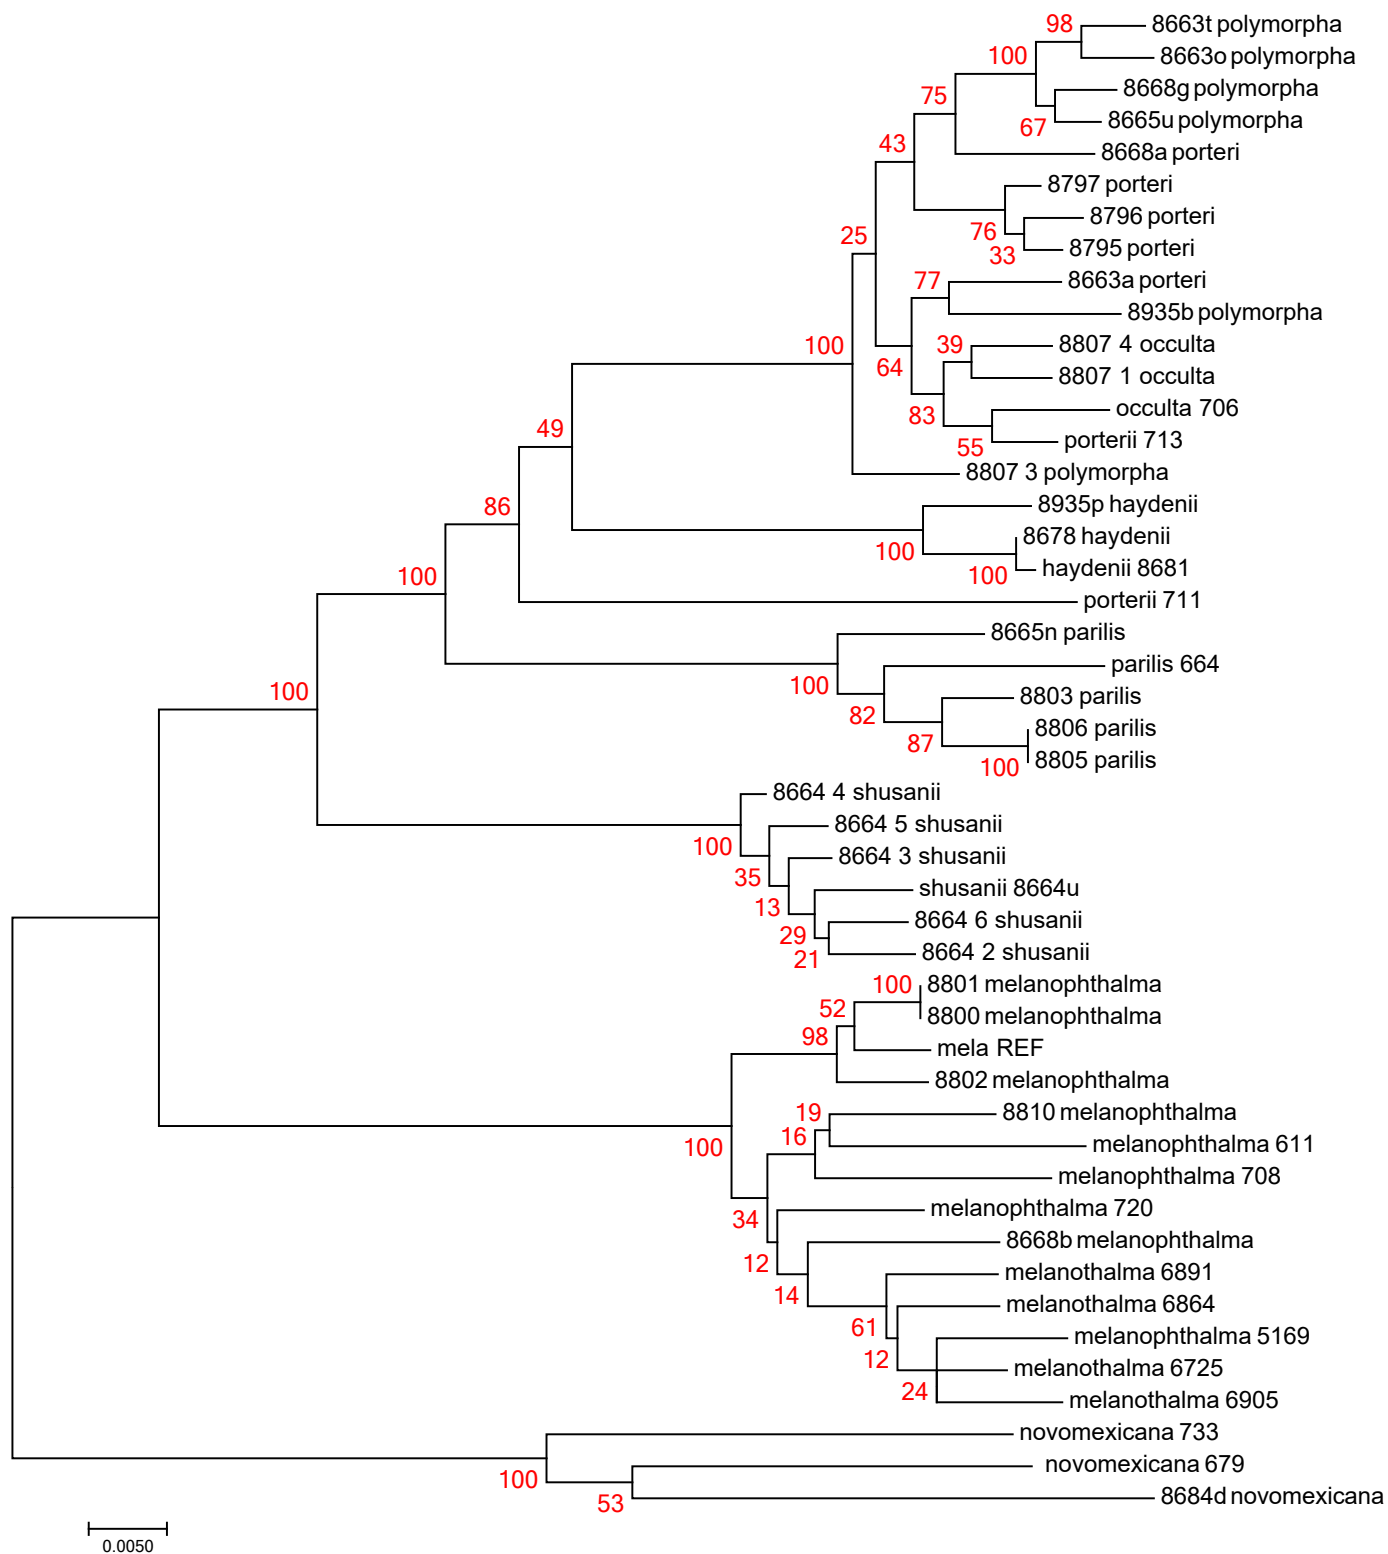

Supplement: 41598_2017_9906_MOESM1_ESM.pdf [file 41598_2017_9906_MOESM1_ESM.pdf]
